# Supplementary material
Source: PubMed Central journal article supplement (PMC9277158)
Supplement: NIHMS1066849-supplement-supplementary.pdf [file NIHMS1066849-supplement-supplementary.pdf]

**Supplement Data 1.**

| GeneID         | Anova.pValue | Stimulated Ave. | Control Ave. | Fold changes |
|----------------|--------------|-----------------|--------------|--------------|
| IGFBP3         | 1.40E-08     | 5.144006496     | 2.377682045  | 6.80372321   |
| GREM1          | 6.44E-10     | 7.000234478     | 4.482870056  | 5.725352109  |
| RNA5SP392      | 0.002123534  | 6.047595732     | 3.727005206  | 4.995366491  |
| CYR61          | 7.19E-07     | 5.077963665     | 2.824834686  | 4.767156473  |
| THBS1          | 7.91E-07     | 5.166142886     | 2.929030571  | 4.714524645  |
| STC2           | 1.32E-06     | 4.411791598     | 2.248362733  | 4.479783046  |
| AC009469.1     | 4.33E-06     | 3.451380315     | 1.312315584  | 4.40476402   |
| RP5-890E16.4   | 0.001130721  | 3.973857212     | 1.839089144  | 4.39166518   |
| KRTAP2-3       | 0.000449872  | 3.753874984     | 1.711037113  | 4.120552724  |
| B4GALT1        | 2.52E-07     | 4.963255958     | 2.944094758  | 4.053480491  |
| CTGF           | 1.25E-05     | 7.620971335     | 5.616804005  | 4.011570996  |
| MIR4647        | 0.01597002   | 5.246008355     | 3.273843518  | 3.923564283  |
| AC015987.2     | 0.000113045  | 4.980079887     | 3.012509545  | 3.911088934  |
| ELL2           | 1.35E-07     | 4.000802304     | 2.04776763   | 3.871881165  |
| CTD-2033A16.1  | 3.12E-05     | 3.14154435      | 1.197407962  | 3.848073588  |
| AC006483.1     | 0.021474196  | 5.985574932     | 4.062607521  | 3.792022201  |
| CTD-2033D15.1  | 0.003115257  | 3.817440661     | 1.917959953  | 3.730788844  |
| TXNRD1         | 1.25E-06     | 5.653994935     | 3.788408524  | 3.644160274  |
| GAS6           | 5.46E-08     | 4.143507838     | 2.317588484  | 3.545328609  |
| CCND1          | 3.36E-05     | 5.658070696     | 3.832383344  | 3.544758526  |
| TGFB2          | 4.12E-05     | 4.022313275     | 2.211158235  | 3.509231298  |
| ORAOV1         | 2.72E-06     | 4.430862772     | 2.660944673  | 3.410345957  |
| RP11-789C17.5  | 0.000393793  | 2.826168894     | 1.087792458  | 3.336594664  |
| RP11-73M18.8   | 0.000473126  | 2.599461965     | 0.871010112  | 3.313720342  |
| P4HA2-AS1      | 0.002567517  | 5.910903504     | 4.188882926  | 3.298981249  |
| KRT81          | 0.0016652    | 6.63408939      | 4.925015645  | 3.269508434  |
| SLC2A1         | 3.02E-05     | 2.627331844     | 0.929839687  | 3.243366724  |
| RP11-388M20.7  | 0.001300802  | 2.514968784     | 0.843889651  | 3.184527065  |
| SDC1           | 0.000175332  | 3.586715047     | 1.931997278  | 3.14861589   |
| LUM            | 0.002815078  | 4.537759476     | 2.884989937  | 3.144366837  |
| DYX1C1-CCPG1   | 0.000191555  | 4.380009124     | 2.728449598  | 3.141730708  |
| PAPPA-AS1      | 0.002756501  | 5.783915685     | 4.134607649  | 3.136831503  |
| ANKRD1         | 0.002565501  | 3.521936988     | 1.880113072  | 3.120601022  |
| SERPINE1       | 6.47E-05     | 8.117197446     | 6.476896564  | 3.117308384  |
| RRAS2          | 6.45E-05     | 2.730662484     | 1.098956211  | 3.098792758  |
| RP11-571M6.7   | 0.00230886   | 6.568195593     | 4.945970164  | 3.078495435  |
| HADHA          | 0.000710342  | 4.427305269     | 2.865920727  | 2.951369479  |
| MICA           | 0.000355224  | 2.538805046     | 1.015662946  | 2.874163434  |
| RCAN1          | 0.000461962  | 3.381937212     | 1.858817199  | 2.874119432  |
| MIR3652        | 0.026041118  | 4.67403717      | 3.154095088  | 2.867795364  |
| RP11-1002K11.1 | 5.25E-05     | 2.187311881     | 0.672169708  | 2.858269941  |
| UGCG           | 0.000282662  | 3.108521515     | 1.598706519  | 2.847735188  |
| IGFBP5         | 0.000275342  | 6.792116764     | 5.301223513  | 2.810629428  |
| CCDC80         | 7.90E-05     | 6.526948379     | 5.051101169  | 2.781469354  |
| PRNP           | 0.001116001  | 5.46710365      | 3.99208134   | 2.779879429  |
| RP5-1050D4.3   | 0.021541932  | 4.247807616     | 2.78297482   | 2.760314777  |
| RP1-65P5.3     | 0.029524267  | 4.848228492     | 3.389381082  | 2.748886634  |
| RP1-20B21.4    | 0.021209567  | 3.640807058     | 2.196484761  | 2.721349584  |
| TGM2           | 0.00087961   | 5.278549808     | 3.850693993  | 2.690465515  |
| AMIGO2         | 0.000961126  | 2.898817854     | 1.482444971  | 2.669136124  |
| FHL1           | 0.000966669  | 4.42886761      | 3.016220044  | 2.662252789  |
| ZMYM6NB        | 0.013396368  | 3.85740416      | 2.449188782  | 2.654086477  |

|                |             |             |             |              |
|----------------|-------------|-------------|-------------|--------------|
| CDC16          | 0.001016973 | 3.162170185 | 1.758420567 | 2.645883644  |
| TAF7           | 0.001575274 | 4.588243064 | 3.191637552 | 2.632813834  |
| ENC1           | 0.001155021 | 4.450788636 | 3.064179737 | 2.614633799  |
| PITPNA-AS1     | 0.014878921 | 3.299037215 | 1.924350109 | 2.59311665   |
| TMEM47         | 0.000157409 | 2.275761804 | 0.922773694 | 2.554406467  |
| RP11-1017G21.4 | 0.002557992 | 3.885109634 | 2.537727231 | 2.544500373  |
| F3             | 0.006475169 | 4.748680607 | 3.421304006 | 2.509459393  |
| DDAH1          | 0.005488604 | 4.361040994 | 3.052479988 | 2.476943577  |
| NFE2L1         | 0.000344027 | 3.950987477 | 2.642464131 | 2.476878922  |
| PCYOX1         | 0.001332257 | 3.078431006 | 1.772071221 | 2.473167214  |
| GLS            | 0.000422507 | 3.52147102  | 2.2201712   | 2.464508267  |
| TXNIP          | 0.003106099 | 2.66251602  | 1.37621497  | 2.439019091  |
| P4HA2          | 0.003347905 | 3.606824124 | 2.343452869 | 2.400560432  |
| DSP            | 0.001496188 | 2.647754082 | 1.385592424 | 2.398548577  |
| ACTA2-AS1      | 0.012157947 | 6.279711656 | 5.023266795 | 2.389062939  |
| ACTA2          | 0.012285911 | 6.297846711 | 5.045597476 | 2.382125191  |
| PFKP           | 0.004232288 | 3.516949631 | 2.265649284 | 2.380558937  |
| AC006369.2     | 0.006885491 | 3.138992761 | 1.90344982  | 2.35469947   |
| GOLM1          | 0.002521099 | 3.580413074 | 2.357312997 | 2.334478135  |
| TMEM30A        | 0.003056749 | 3.349712309 | 2.131755731 | 2.326170068  |
| EDIL3          | 9.48E-05    | 6.249295604 | 5.03373478  | 2.322310413  |
| SLC1A5         | 0.000807851 | 2.863216533 | 1.656500055 | 2.308117194  |
| TGOLN2         | 0.001668862 | 4.065416115 | 2.874140267 | 2.283545994  |
| PPIC           | 0.005427707 | 3.602940471 | 2.413660459 | 2.280389102  |
| ATP1B3         | 0.007269476 | 5.215810738 | 4.02911928  | 2.276301186  |
| PAPPA          | 0.004965198 | 4.314565499 | 3.151693952 | 2.239026413  |
| LOX            | 0.004415408 | 3.003547832 | 1.865539316 | 2.20077021   |
| ZMPSTE24       | 0.006973175 | 3.35160428  | 2.227224382 | 2.180078218  |
| TGFBR2         | 0.005185435 | 2.850161232 | 1.745918625 | 2.149859841  |
| PDCD1LG2       | 0.01147354  | 2.319146942 | 1.232375754 | 2.123981483  |
| ACTC1          | 0.042531649 | 2.594563288 | 1.510088629 | 2.120603148  |
| DNAJB4         | 0.016428768 | 3.513424665 | 2.429798293 | 2.119356626  |
| PTPLA          | 0.033157268 | 3.972931337 | 2.890549364 | 2.117529361  |
| PLOD1          | 0.012873598 | 3.965861819 | 2.89102084  | 2.10648987   |
| ADM            | 0.026520773 | 2.193508663 | 1.124031315 | 2.098672933  |
| CHAC1          | 0.019816998 | 2.324828464 | 1.266288941 | 2.08282196   |
| RP11-161H23.5  | 0.006603151 | 7.972251241 | 6.918431504 | 2.076019129  |
| GNS            | 0.004833002 | 4.446894421 | 3.397907825 | 2.069075939  |
| C5orf30        | 0.019273401 | 4.365885577 | 3.32200825  | 2.061761317  |
| REEP5          | 0.017333765 | 4.118876413 | 3.08946909  | 2.041185534  |
| SMPD1          | 0.039584675 | 3.800818252 | 2.777860754 | 2.032080421  |
| PSPH           | 0.012942148 | 2.310473124 | 1.290781889 | 2.027484991  |
| RP5-977B1.11   | 0.007746063 | 7.80776102  | 6.801558328 | 2.008617267  |
| CAP2           | 0.03175067  | 3.226264691 | 2.221144623 | 2.007110531  |
| TUBA1C         | 0.007145594 | 5.670598299 | 4.66830632  | 2.003179883  |
| COX5B          | 0.004812273 | 6.651420759 | 7.662900343 | -2.015977567 |
| TIMM8B         | 0.041632786 | 4.837812858 | 5.849518209 | -2.016293069 |
| EDF1           | 0.003571502 | 6.256239674 | 7.285157829 | -2.040493557 |
| SNRPC          | 0.042519905 | 5.142674195 | 6.177710551 | -2.049165285 |
| RP11-175B9.3   | 0.008022884 | 3.443159798 | 4.48112551  | -2.053330291 |
| ZFAS1          | 0.017893912 | 5.993744459 | 7.049818013 | -2.079264876 |
| AC016739.2     | 0.008394913 | 2.981349516 | 4.057359615 | -2.108197604 |
| CTD-2192J16.15 | 0.005792431 | 3.336689044 | 4.414165201 | -2.11034103  |
| PSMA7          | 0.00077989  | 6.775140492 | 7.859078737 | -2.119814825 |
| CTC-575D19.1   | 0.001214081 | 4.41636952  | 5.5064571   | -2.128869596 |

|                |             |             |             |              |
|----------------|-------------|-------------|-------------|--------------|
| RSPH9          | 0.014960344 | 1.407238947 | 2.503081477 | -2.137378676 |
| RPL10P3        | 0.006343236 | 2.043071802 | 3.148295427 | -2.15132222  |
| NDUFB11        | 0.02465188  | 3.219134811 | 4.340675122 | -2.175791496 |
| NDUFA12        | 0.006996685 | 5.697812021 | 6.833629855 | -2.197430953 |
| ATP5C1         | 0.006367844 | 4.373445145 | 5.518715603 | -2.211875923 |
| SNURF          | 0.002690037 | 3.797145995 | 4.956136358 | -2.233011007 |
| AC011737.2     | 0.002034895 | 5.310634238 | 6.473013995 | -2.238263295 |
| RP11-290D2.6   | 0.007718324 | 3.716853502 | 4.8863416   | -2.249318718 |
| MRPS15         | 0.018381576 | 1.998470196 | 3.171438668 | -2.254751549 |
| NDUFB2-AS1     | 0.001406701 | 5.100448545 | 6.281063353 | -2.266733538 |
| S100A13        | 0.007020315 | 2.332227417 | 3.515509219 | -2.270927742 |
| MRPS18A        | 0.024341671 | 1.854021574 | 3.04016329  | -2.275433961 |
| UQCRH          | 0.004540263 | 5.121884779 | 6.311945402 | -2.281623306 |
| RNF181         | 0.017500807 | 4.769673754 | 5.962560877 | -2.286097798 |
| RP11-259O2.3   | 0.021178    | 1.996575137 | 3.200275714 | -2.3032972   |
| ETFB           | 0.001187348 | 2.573658299 | 3.778482563 | -2.30509189  |
| PSMB3          | 0.01469637  | 5.686208991 | 6.895161711 | -2.311697652 |
| NDUFA11        | 0.001331855 | 4.494782148 | 5.706218807 | -2.315681212 |
| RP1-178F15.5   | 0.011577758 | 2.4015564   | 3.614660183 | -2.318358674 |
| RANBP1         | 0.00079101  | 2.269439938 | 3.487698894 | -2.326657669 |
| CKS2           | 0.031256716 | 2.812441892 | 4.050074643 | -2.358112832 |
| CHMP2A         | 0.003842377 | 3.606908841 | 4.849645233 | -2.366469603 |
| NSA2           | 0.003220401 | 3.795818763 | 5.04113976  | -2.370712962 |
| UBA52          | 0.000175076 | 4.965129183 | 6.212598221 | -2.374245366 |
| LAMTOR1        | 0.005166366 | 4.041332456 | 5.301464366 | -2.395176396 |
| APRT           | 0.014322956 | 3.880159219 | 5.142619562 | -2.399045206 |
| NHP2           | 0.009125865 | 4.776132344 | 6.051029579 | -2.419815805 |
| COX5A          | 0.007722317 | 4.666378501 | 5.952643461 | -2.438958077 |
| CTD-2090I13.1  | 4.1952E-08  | 2.831798177 | 4.123570186 | -2.448285849 |
| ZNF32-AS1      | 0.027886575 | 1.559346315 | 2.854441335 | -2.453931572 |
| MRPL9          | 0.006460824 | 2.270260224 | 3.569347978 | -2.460732363 |
| SNF8           | 0.000586854 | 2.191719413 | 3.503212231 | -2.481982284 |
| CTD-2410N18.5  | 0.00158137  | 3.497597678 | 4.809305366 | -2.48235197  |
| FUT5           | 0.00182388  | 4.690256415 | 6.003533336 | -2.485053516 |
| RP11-84A1.1    | 0.002402092 | 2.643102234 | 3.963311077 | -2.497022538 |
| AC024592.12    | 0.001938857 | 4.835155333 | 6.162458239 | -2.509331209 |
| NME1           | 0.001500138 | 4.069382586 | 5.397451274 | -2.510663514 |
| NDUFB4         | 0.000744867 | 4.953972555 | 6.284962446 | -2.515752316 |
| CTD-2616J11.9  | 0.026356594 | 5.606134168 | 6.947477118 | -2.533870775 |
| IGBP1          | 0.009108072 | 2.22867755  | 3.573239628 | -2.539530989 |
| RP11-203J24.9  | 0.001832162 | 3.273326671 | 4.618969569 | -2.541434233 |
| CTD-2616J11.11 | 0.009022456 | 2.684575751 | 4.034879268 | -2.5496576   |
| NACAP1         | 8.11136E-05 | 2.760348023 | 4.111335947 | -2.550867433 |
| POLR2G         | 0.012907732 | 2.797017803 | 4.152122239 | -2.55815634  |
| PSME2          | 0.000474571 | 4.566204243 | 5.934169047 | -2.581062014 |
| RP11-3P17.3    | 2.11265E-05 | 3.995960592 | 5.393134856 | -2.633851969 |
| POLR2J         | 0.002409043 | 4.445338914 | 5.851870807 | -2.650991221 |
| ATP5H          | 0.000120732 | 3.894359324 | 5.304166044 | -2.657015639 |
| RP11-51O6.1    | 3.8672E-07  | 5.725021532 | 7.142315338 | -2.670840471 |
| RP4-741O10.1   | 0.015224884 | 3.069482595 | 4.48853676  | -2.674101387 |
| COX7A2         | 0.000133478 | 6.316223368 | 7.736071434 | -2.675573322 |
| AC010761.8     | 7.12412E-09 | 6.547032629 | 7.979264302 | -2.69863839  |
| RP5-1052M9.1   | 0.006016996 | 5.134275164 | 6.575638757 | -2.715774312 |
| ATP5G1         | 0.000742619 | 4.459919932 | 5.909335214 | -2.730973437 |
| ITPA           | 0.00455006  | 2.347136464 | 3.816005505 | -2.768048155 |

|               |             |             |             |              |
|---------------|-------------|-------------|-------------|--------------|
| RPL37P2       | 0.000707494 | 3.574227111 | 5.044536447 | -2.770812977 |
| ATP5O         | 4.33911E-05 | 5.1199926   | 6.600181515 | -2.789852629 |
| CTD-2090I13.3 | 3.03217E-07 | 4.934023142 | 6.419991678 | -2.801051553 |
| RP11-123M6.2  | 0.007990768 | 6.027355917 | 7.521889899 | -2.817731184 |
| AP000304.12   | 0.000236564 | 6.279752495 | 7.811302524 | -2.890962767 |
| PSMD8         | 0.000372258 | 3.525963704 | 5.05996071  | -2.895870334 |
| NACA2         | 9.28277E-06 | 2.687483463 | 4.22682786  | -2.90662388  |
| NDUFS6        | 0.00255821  | 3.737646323 | 5.287735063 | -2.928351509 |
| STOML2        | 0.005007779 | 2.543651336 | 4.108332225 | -2.958120637 |
| COX7B         | 0.00011143  | 3.584971781 | 5.151445488 | -2.961798939 |
| RBP1          | 0.002410823 | 1.774244167 | 3.358055662 | -2.997607504 |
| RPS15AP1      | 4.13788E-05 | 3.851330933 | 5.45110585  | -3.030960219 |
| TCEB2P1       | 2.07797E-05 | 6.706351764 | 8.323603285 | -3.067900134 |
| NDUFA8        | 0.001532161 | 3.192007206 | 4.815234917 | -3.080634896 |
| RP11-3P17.5   | 1.84733E-05 | 4.716083993 | 6.342398379 | -3.087233032 |
| PFDN5         | 4.89051E-07 | 5.182515112 | 6.83416841  | -3.141934919 |
| AC091133.1    | 0.001873838 | 2.448101922 | 4.108092891 | -3.160145465 |
| MRPL41        | 5.07576E-05 | 5.222985896 | 6.889333042 | -3.174099044 |
| GADD45GIP1    | 0.001289227 | 5.471123155 | 7.148048286 | -3.197457385 |
| RP11-480N24.3 | 0.003872501 | 4.365641255 | 6.044181113 | -3.201038122 |
| C16orf13      | 0.00103608  | 2.583830323 | 4.268263677 | -3.2141413   |
| EIF4EBP1      | 0.000859959 | 4.771217084 | 6.565542832 | -3.468533333 |
| ECI2          | 6.20306E-08 | 3.767191631 | 5.642243665 | -3.668148469 |
| RP11-234A1.1  | 3.66884E-07 | 3.076039032 | 5.036449196 | -3.891726064 |
| HIST1H4C      | 0.00152193  | 2.450099251 | 4.506482117 | -4.159421433 |
| C6orf201      | 5.57588E-07 | 1.608187422 | 3.778272294 | -4.500498692 |
| RPS11P5       | 2.8099E-08  | 4.176246146 | 6.361461944 | -4.54794812  |
| SCARNA22      | 1.83339E-05 | 2.618074587 | 5.437772497 | -7.06014547  |

**Supplement Data 2.**

| NAME                                                                                                                      | Reaction | SIZE | ES    | NES   | FDR q-value |
|---------------------------------------------------------------------------------------------------------------------------|----------|------|-------|-------|-------------|
| HALLMARK_EPITHELIAL_MESENCHYMAL_TRANSITION                                                                                | Stim.    | 129  | 0.58  | 2.45  | <0.001      |
| NABA_MATRISOME                                                                                                            | Stim.    | 178  | 0.55  | 2.40  | <0.001      |
| NABA_ECM_REGULATORS                                                                                                       | Stim.    | 49   | 0.65  | 2.34  | <0.001      |
| NABA_MATRISOME_ASSOCIATED                                                                                                 | Stim.    | 119  | 0.55  | 2.28  | <0.001      |
| HALLMARK_UV_RESPONSE_DN                                                                                                   | Stim.    | 83   | 0.53  | 2.09  | <0.001      |
| GO_CELL_ADHESION_MOLECULE_BINDING                                                                                         | Stim.    | 68   | 0.62  | 2.41  | <0.001      |
| GO_LYSOSOMAL_LUMEN                                                                                                        | Stim.    | 36   | 0.70  | 2.38  | <0.001      |
| GO_CELL_SURFACE                                                                                                           | Stim.    | 199  | 0.51  | 2.27  | 0.002       |
| GO_EXTRACELLULAR_STRUCTURE_ORGANIZATION                                                                                   | Stim.    | 103  | 0.56  | 2.27  | 0.001       |
| GO_ENDOPLASMIC_RETICULUM_PART                                                                                             | Stim.    | 479  | 0.48  | 2.26  | 0.001       |
| GO_CELL_MORPHOGENESIS_INVOLVED_IN_DIFFERENTIATION                                                                         | Stim.    | 161  | 0.53  | 2.25  | 0.001       |
| GO_LOCOMOTION                                                                                                             | Stim.    | 313  | 0.49  | 2.25  | 0.001       |
| GO_INTEGRIN_BINDING                                                                                                       | Stim.    | 44   | 0.64  | 2.23  | 0.001       |
| GO_INTRINSIC_COMPONENT_OF_PLASMA_MEMBRANE                                                                                 | Stim.    | 257  | 0.49  | 2.22  | 0.001       |
| GO_REGULATION_OF_CELL_ADHESION                                                                                            | Stim.    | 195  | 0.50  | 2.21  | <0.001      |
| GO_TRANSFERASE_ACTIVITY_TRANSFERRING_HEXOSYL_GROUPS                                                                       | Stim.    | 69   | 0.57  | 2.21  | <0.001      |
| GO_GOLGI_APPARATUS_PART                                                                                                   | Stim.    | 379  | 0.47  | 2.21  | <0.001      |
| GO_ENDOPLASMIC_RETICULUM_LUMEN                                                                                            | Stim.    | 78   | 0.56  | 2.20  | <0.001      |
| GO_UDP_GLYCOSYLTRANSFERASE_ACTIVITY                                                                                       | Stim.    | 39   | 0.64  | 2.20  | <0.001      |
| GO_NUCLEAR_OUTER_MEMBRANE_ENDOPLASMIC_RETICULUM_MEMBRANE_NETWORK                                                          | Stim.    | 422  | 0.47  | 2.19  | <0.001      |
| GO_VACUOLAR_LUMEN                                                                                                         | Stim.    | 42   | 0.63  | 2.19  | <0.001      |
| GO_GLYCOSYLATION                                                                                                          | Stim.    | 92   | 0.54  | 2.18  | <0.001      |
| GO_SECRETORY_GRANULE                                                                                                      | Stim.    | 90   | 0.54  | 2.18  | <0.001      |
| GO_GOLGI_MEMBRANE                                                                                                         | Stim.    | 322  | 0.47  | 2.17  | <0.001      |
| GO_REGULATION_OF_CELLULAR_COMPONENT_MOVEMENT                                                                              | Stim.    | 262  | 0.47  | 2.17  | <0.001      |
| HALLMARK_OXIDATIVE_PHOSPHORYLATION                                                                                        | Con.     | 176  | -0.50 | -2.60 | <0.001      |
| REACTOME_ACTIVATION_OF_THE_MRNA_UPON_BINDING_OF_THE_CAP_BINDING_COMPLEX_AND_EIF5_AND_SUBSEQUENT_BINDING_TO_43S            | Con.     | 55   | -0.71 | -3.09 | <0.001      |
| REACTOME_FORMATION_OF_THE_TERNARY_COMPLEX_AND_SUBSEQUENTLY_THE_43S_COMPLEX                                                | Con.     | 47   | -0.79 | -3.13 | <0.001      |
| REACTOME_TCA_CYCLE_AND_RESPIRATORY_ELECTRON_TRANSPORT                                                                     | Con.     | 95   | -0.68 | -3.14 | <0.001      |
| REACTOME_RESPIRATORY_ELECTRON_TRANSPORT                                                                                   | Con.     | 62   | -0.74 | -3.25 | <0.001      |
| REACTOME_METABOLISM_OF_RNA                                                                                                | Con.     | 216  | -0.62 | -3.26 | <0.001      |
| REACTOME_RESPIRATORY_ELECTRON_TRANSPORT_ATP_SYNTHESIS_BY_CHEMIOSMOTIC_COUPLING_AND_HEAT_PRODUCTION_BY_UNCOUPLING_PROTEINS | Con.     | 75   | -0.76 | -3.41 | <0.001      |
| REACTOME_METABOLISM_OF_MRNA                                                                                               | Con.     | 193  | -0.66 | -3.47 | <0.001      |
| REACTOME_TRANSLATION                                                                                                      | Con.     | 146  | -0.70 | -3.51 | <0.001      |
| REACTOME_INFLUENZA_LIFE_CYCLE                                                                                             | Con.     | 118  | -0.77 | -3.74 | <0.001      |
| REACTOME_SRP_DEPENDENT_COTRANSLATIONAL_PROTEIN_TARGETING_TO_MEMBRANE                                                      | Con.     | 111  | -0.80 | -3.88 | <0.001      |
| REACTOME_NONSENSE_MEDIATED_DECAY_ENHANCED_BY_THE_EXON_JUNCTION_COMPLEX                                                    | Con.     | 104  | -0.82 | -3.88 | <0.001      |
| REACTOME_3_UTR_MEDIATED_TRANSLATIONAL_REGULATION                                                                          | Con.     | 106  | -0.82 | -3.89 | <0.001      |
| REACTOME_INFLUENZA_VIRAL_RNA_TRANSCRIPTION_AND_REPLICATION                                                                | Con.     | 102  | -0.85 | -4.07 | <0.001      |

|                                                                       |      |     |       |       |        |
|-----------------------------------------------------------------------|------|-----|-------|-------|--------|
| REACTOME_PEPTIDE_CHAIN_ELONGATION                                     | Con. | 87  | -0.90 | -4.13 | <0.001 |
| GO_CYTOSOLIC_RIBOSOME                                                 | Con. | 100 | -0.86 | -4.11 | <0.001 |
| GO_RIBOSOMAL_SUBUNIT                                                  | Con. | 149 | -0.79 | -3.99 | <0.001 |
| GO_STRUCTURAL_CONSTITUENT_OF_RIBOSOME                                 | Con. | 167 | -0.77 | -3.92 | <0.001 |
| GO_ESTABLISHMENT_OF_PROTEIN_LOCALIZATION_TO_ENDOPLASMIC_RETICULUM     | Con. | 101 | -0.82 | -3.86 | <0.001 |
| GO_NUCLEAR_TRANSCRIBED_MRNA_CATABOLIC_PROCESS_NONSENSE_MEDIATED_DECAY | Con. | 110 | -0.79 | -3.81 | <0.001 |
| GO_MULTI_ORGANISM_METABOLIC_PROCESS                                   | Con. | 107 | -0.78 | -3.75 | <0.001 |
| GO_PROTEIN_LOCALIZATION_TO_ENDOPLASMIC_RETICULUM                      | Con. | 113 | -0.77 | -3.72 | <0.001 |
| GO_CYTOSOLIC_PART                                                     | Con. | 147 | -0.72 | -3.71 | <0.001 |
| GO_RIBOSOME                                                           | Con. | 196 | -0.70 | -3.71 | <0.001 |
| GO_CYTOSOLIC_LARGE_RIBOSOMAL_SUBUNIT                                  | Con. | 57  | -0.88 | -3.70 | <0.001 |
| GO_PROTEIN_TARGETING_TO_MEMBRANE                                      | Con. | 115 | -0.75 | -3.69 | <0.001 |
| GO_TRANSLATIONAL_INITIATION                                           | Con. | 133 | -0.74 | -3.68 | <0.001 |
| GO_LARGE_RIBOSOMAL_SUBUNIT                                            | Con. | 87  | -0.80 | -3.62 | <0.001 |
| GO_RRNA_METABOLIC_PROCESS                                             | Con. | 182 | -0.67 | -3.51 | <0.001 |
| GO_SMALL_RIBOSOMAL_SUBUNIT                                            | Con. | 62  | -0.79 | -3.41 | <0.001 |
| GO_RNA_CATABOLIC_PROCESS                                              | Con. | 170 | -0.67 | -3.39 | <0.001 |
| GO_CYTOSOLIC_SMALL_RIBOSOMAL_SUBUNIT                                  | Con. | 38  | -0.88 | -3.36 | <0.001 |
| GO_RIBOSOME_BIOGENESIS                                                | Con. | 216 | -0.61 | -3.22 | <0.001 |
| GO_INNER_MITOCHONDRIAL_MEMBRANE_PROTEIN_COMPLEX                       | Con. | 90  | -0.69 | -3.19 | <0.001 |
| GO_OXIDATIVE_PHOSPHORYLATION                                          | Con. | 73  | -0.69 | -3.12 | <0.001 |

\* ES= Enrichment Score

\*NES= Normalized Enrichment Score

**Supplement Data 3.**

| Target Genes |   | Sequence                 | Product (bp) |
|--------------|---|--------------------------|--------------|
| hGREM1       | F | ATGACATTCAGAACCAGCAA     | 268          |
|              | R | TAGGCACAGTAAGAAGAACAGATA |              |
| hIGFBP3      | F | AAGTTGACTACGAGTCTCAG     | 83           |
|              | R | ACGGCAGGGACCATATTC       |              |
| hIGFBP5      | F | GGTTTGCCTCAACGAAAAGA     | 105          |
|              | R | GAGTAGGTCTCCTCGGCCAT     |              |
| hSTC2        | F | ATGCTACCTCAAGCACGACC     | 185          |
|              | R | TCTGCTCACACTGAACC        |              |
| hCTGF        | F | GTGCACCGCCAAAGATGGT      | 66           |
|              | R | AAGGACTCTCCGCTGCGGTA     |              |
| hPAPPA       | F | GTCATCTTTGCCTGGAAGGGAGAA | 129          |
|              | R | AGGGCTGTTCAACATCAGGATGAC |              |
| hTHBS1       | F | ACATGCCACGGCCAACAAA      | 101          |
|              | R | AGTGGCCCAGGTAGTTGCACTT   |              |
| hGAPDH       | F | GTCTCCTCTGACTTCAACAGCG   | 131          |
|              | R | ACCACCCTGTTGCTGTAGCCAA   |              |

**Supplement Data 4.**

| Gene Symbol | Gene Description                                                             |
|-------------|------------------------------------------------------------------------------|
| NDC80       | NDC80 homolog, kinetochore complex component ( <i>S. cerevisiae</i> )        |
| AURKB       | aurora kinase B                                                              |
| BIRC5       | baculoviral IAP repeat containing 5                                          |
| CDCA8       | cell division cycle associated 8                                             |
| CDC20       | cell division cycle 20 homolog ( <i>S. cerevisiae</i> )                      |
| CKAP5       | cytoskeleton associated protein 5                                            |
| CENPN       | centromere protein N                                                         |
| ZWINT       | ZW10 interactor                                                              |
| SGOL2       | shugoshin-like 2 ( <i>S. pombe</i> )                                         |
| SPC25       | SPC25, NDC80 kinetochore complex component, homolog ( <i>S. cerevisiae</i> ) |
| CENPM       | centromere protein M                                                         |
| KIF23       | kinesin family member 23                                                     |
| AURKA       | aurora kinase A                                                              |
| CCNB1       | cyclin B1                                                                    |
| CCNB2       | cyclin B2                                                                    |
| CKS1B       | CDC28 protein kinase regulatory subunit 1B                                   |
| PTTG1       | pituitary tumor-transforming 1                                               |
| UBE2C       | ubiquitin-conjugating enzyme E2C                                             |
| RRM2        | ribonucleotide reductase M2                                                  |
| HIST1H4C    | histone cluster 1, H4c                                                       |
| SMC4        | structural maintenance of chromosomes 4                                      |
| SMC2        | structural maintenance of chromosomes 2                                      |
| NCAPG       | non-SMC condensin I complex, subunit G                                       |
| TPX2        | TPX2, microtubule-associated, homolog ( <i>Xenopus laevis</i> )              |
| CLSPN       | claspin                                                                      |
| CENPE       | centromere protein E, 312kDa                                                 |
| PRC1        | protein regulator of cytokinesis 1                                           |
| DLGAP5      | discs, large ( <i>Drosophila</i> ) homolog-associated protein 5              |
| CENPF       | centromere protein F, 350/400kDa (mitosin)                                   |
